# Supplementary material
Source: PubMed Central journal article supplement (PMC7075353)
Supplement: NIHMS1556615-supplement-Supplemental_Materials.pdf [file NIHMS1556615-supplement-Supplemental_Materials.pdf]

Supplemental Table 1. Frequency of Number of Alcohol-Related Problems

| <i>Number of Problems</i> | <i>N</i> | <i>Percent</i> |
|---------------------------|----------|----------------|
| 0                         | 456      | 68.3           |
| 1                         | 68       | 10.2           |
| 2                         | 37       | 0.06           |
| 3                         | 30       | 0.04           |
| 4                         | 19       | 0.03           |
| 5                         | 11       | 0.02           |
| 6                         | 13       | 0.02           |
| 7                         | 9        | 0.01           |
| 8                         | 5        | 0.01           |
| 9                         | 4        | 0.01           |
| 10                        | 1        | 0.0            |
| 11                        | 1        | 0.0            |
| 12                        | 1        | 0.0            |
| 13                        | 3        | 0.0            |
| 14                        | 3        | 0.0            |
| 15                        | 1        | 0.0            |
| 16                        | 2        | 0.0            |
| 17                        | 1        | 0.0            |
| 18                        | 1        | 0.0            |
| 19                        | 2        | 0.0            |
| Total                     | 668      | 100.0          |

Note. The number of participants who completed this measure is 668. Two participants reported drinking 5+ times during the past year but did not provide data on motivations for drinking.

Supplemental Table 2. Frequency of Alcohol-Related Problems by Item

| <i>Item Description (N)</i>                 | <u>0 Times</u> |            | <u>1 Time</u> |           | <u>2 Times</u> |     | <u>3+ Times</u> |     |
|---------------------------------------------|----------------|------------|---------------|-----------|----------------|-----|-----------------|-----|
|                                             | N              | %          | N             | %         | N              | %   | N               | %   |
| 1. Interfered with homework (643)           | 575            | 89.4       | 24            | 3.7       | 28             | 4.4 | 16              | 2.5 |
| 2. Go to school drunk (656)                 | 621            | 94.7       | 19            | 2.9       | 9              | 1.4 | 7               | 1.1 |
| 3. Neglected responsibilities (668)         | 604            | 90.4       | 23            | 3.4       | 21             | 3.1 | 20              | 3.0 |
| 4. Physical fights (668)                    | 625            | 93.6       | 25            | 3.7       | 11             | 1.6 | 7               | 1.0 |
| 5. Legal problems (668)                     | 653            | 97.8       | 12            | 1.8       | 3              | 0.4 | 0               | 0   |
| 6. Hazardous use (668)                      | 599            | 89.7       | 39            | 5.8       | 16             | 2.4 | 14              | 2.1 |
| 7. Risky sex (668)                          | 617            | 92.4       | 25            | 3.7       | 12             | 1.8 | 14              | 2.1 |
| 8. Frequently miss school (660)             | 607            | 92.0       | 26            | 3.9       | 16             | 2.4 | 11              | 1.7 |
| 9. Frequent family arguments (668)          | 614            | 91.9       | 30            | 4.5       | 13             | 1.9 | 11              | 1.6 |
|                                             |                | <u>Yes</u> |               | <u>No</u> |                |     |                 |     |
|                                             | N              | %          | N             | %         |                |     |                 |     |
| 10. Use despite interpersonal problems (54) | 33             | 61.1       | 21            | 38.9      |                |     |                 |     |

Note. These items create a summary construct of alcohol-related problems, which reflects a severity scale.

Supplemental Table 3. Affective and Sensation Seeking Pathways from Borderline Personality Disorder Symptoms to Alcohol Use.

| <b>Associations with Alcohol-related Problems</b>   | <b><math>\beta</math></b> | <b>SE</b>    | <b>95% C.I</b>       |
|-----------------------------------------------------|---------------------------|--------------|----------------------|
| BPD symptoms                                        | <b>0.12</b>               | <b>0.04</b>  | <b>0.04 – 0.19</b>   |
| Affective Instability                               | 0.00                      | 0.04         | -0.08 – 0.08         |
| Sensation Seeking                                   | <b>0.24</b>               | <b>0.04</b>  | <b>0.16 – 0.32</b>   |
| Coping motives                                      | <b>0.11</b>               | <b>0.04</b>  | <b>0.02 – 0.20</b>   |
| Enhancement motives                                 | <b>0.13</b>               | <b>0.04</b>  | <b>0.05 – 0.20</b>   |
| <b>Associations with Coping Motives</b>             |                           |              |                      |
| BPD symptoms                                        | <b>0.16</b>               | <b>0.04</b>  | <b>0.08 - 0.24</b>   |
| Affective Instability                               | <b>0.26</b>               | <b>0.04</b>  | <b>0.18 – 0.35</b>   |
| Sensation Seeking                                   | <b>0.10</b>               | <b>0.04</b>  | <b>0.03 – 0.17</b>   |
| <b>Associations with Enhancement Motives</b>        |                           |              |                      |
| BPD symptoms                                        | 0.05                      | 0.05         | -0.04 – 0.14         |
| Affective Instability                               | <b>0.15</b>               | <b>0.05</b>  | <b>0.06 – 0.24</b>   |
| Sensation Seeking                                   | <b>0.14</b>               | <b>0.04</b>  | <b>0.07 – 0.22</b>   |
| <b>Associations with Affective Instability (AI)</b> |                           |              |                      |
| BPD symptoms                                        | <b>0.62</b>               | <b>0.01</b>  | <b>0.59 – 0.64</b>   |
| <b>Associations with Sensation Seeking (SS)</b>     |                           |              |                      |
| BPD symptoms                                        | <b>0.17</b>               | <b>0.02</b>  | <b>0.11 – 0.21</b>   |
| <b>Indirect Effects</b>                             |                           |              |                      |
| <u>Affective Pathway:</u>                           |                           |              |                      |
| BPD → AI → Coping → Alcohol Problems                | <b>0.010</b>              | <b>0.005</b> | <b>0.001 – 0.019</b> |
| <u>Sensation Seeking Pathway:</u>                   |                           |              |                      |
| BPD → SS → Enhancement → Alcohol Problems           | <b>0.002</b>              | <b>0.001</b> | <b>0.000 – 0.003</b> |
| Total Indirect Effect                               | <b>0.012</b>              | <b>0.005</b> | <b>0.003 – 0.021</b> |

Note. N=2101, BPD=borderline personality disorder, C.I.=confidence interval.

\*Effects are after controlling for race and receipt of public assistance. Significant effects are bolded.
